# Supplementary material for: Influences of Vitamin B12 Supplementation on Cognition and Homocysteine in Patients with Vitamin B12 Deficiency and Cognitive Impairment
Source: MDPI journal article supplement (doi:10.3390/nu14071494), 2022-04-02
Supplement: s1 [file s1]

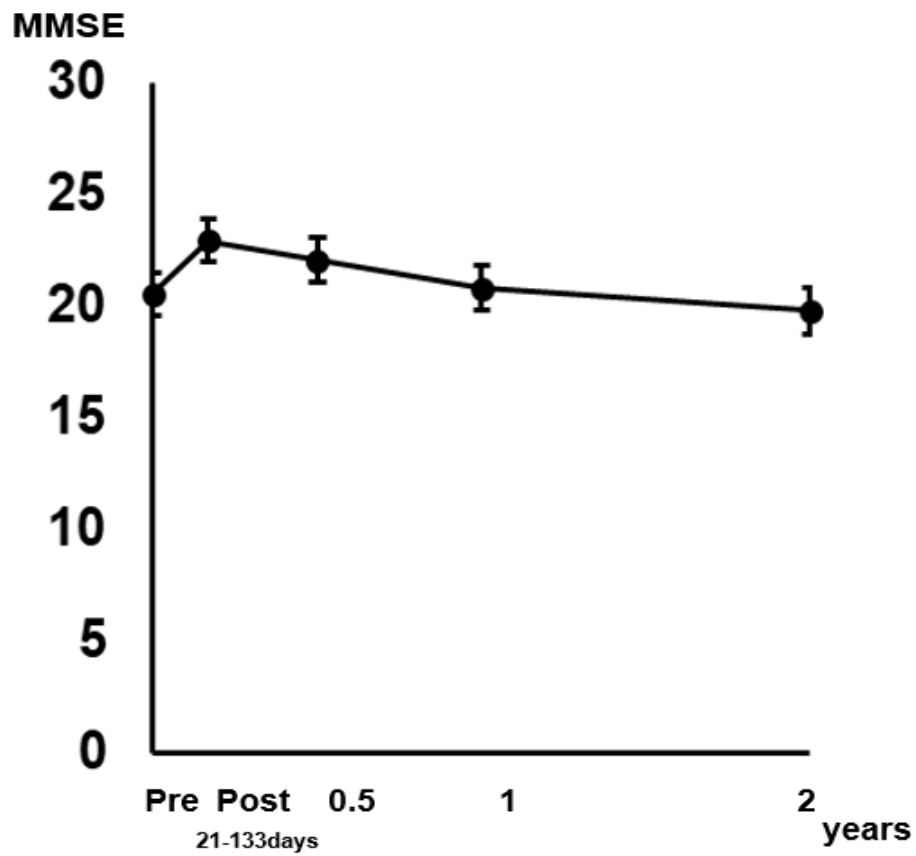

**Supplementary Figure S1.** Long duration of Mini-Mental State Examination (MMSE) score follow-up at 0.5 year, 1 year, and 2 year later was analyzed by the Generalized mixed model (GLMM).

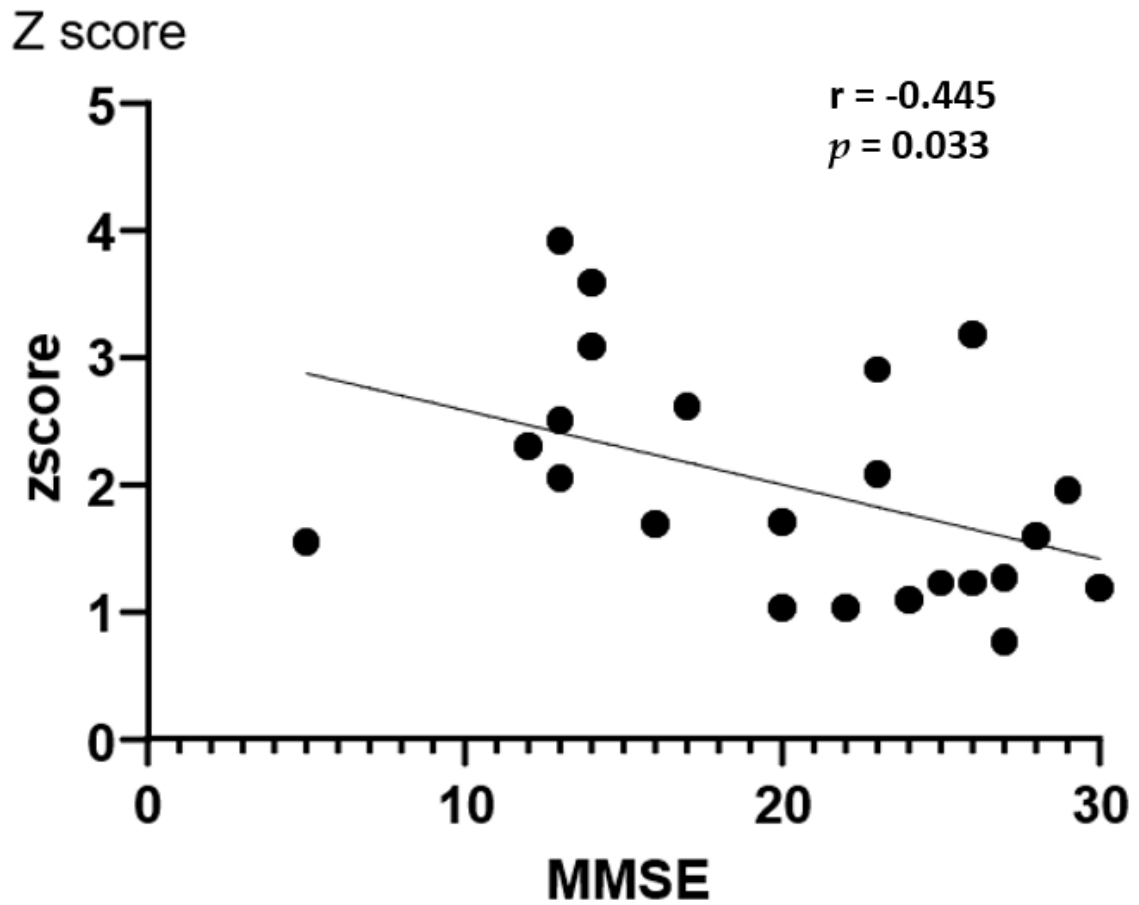

**Supplementary Figure S2.** Inverse correlation is shown between mini-mental state examination (MMSE) score and hippocampal atrophy estimated by VSRAD z-score ( $r = -0.445$ ,  $p = 0.033$ ) was analyzed by the Pearson's correlation coefficient.

**Hcy change (nmol/mL)**

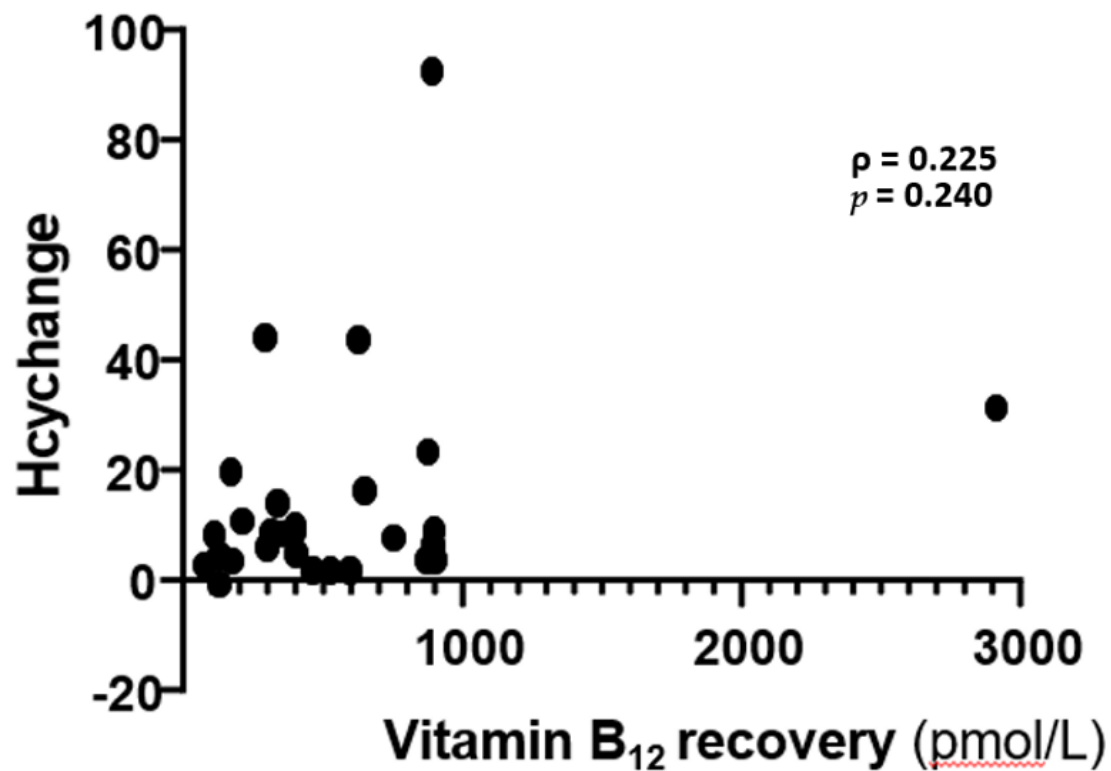

**Supplementary Figure S3.** There was no correlation between the degree of homocysteine (Hcy) decrease and change of vitamin B<sub>12</sub> ( $\rho = 0.225$ ,  $p = 0.240$ ) was analyzed by the Spearman's rank correlation coefficient because the data of Hcy recovery and vitamin B<sub>12</sub> recovery deviated from a normal distribution.

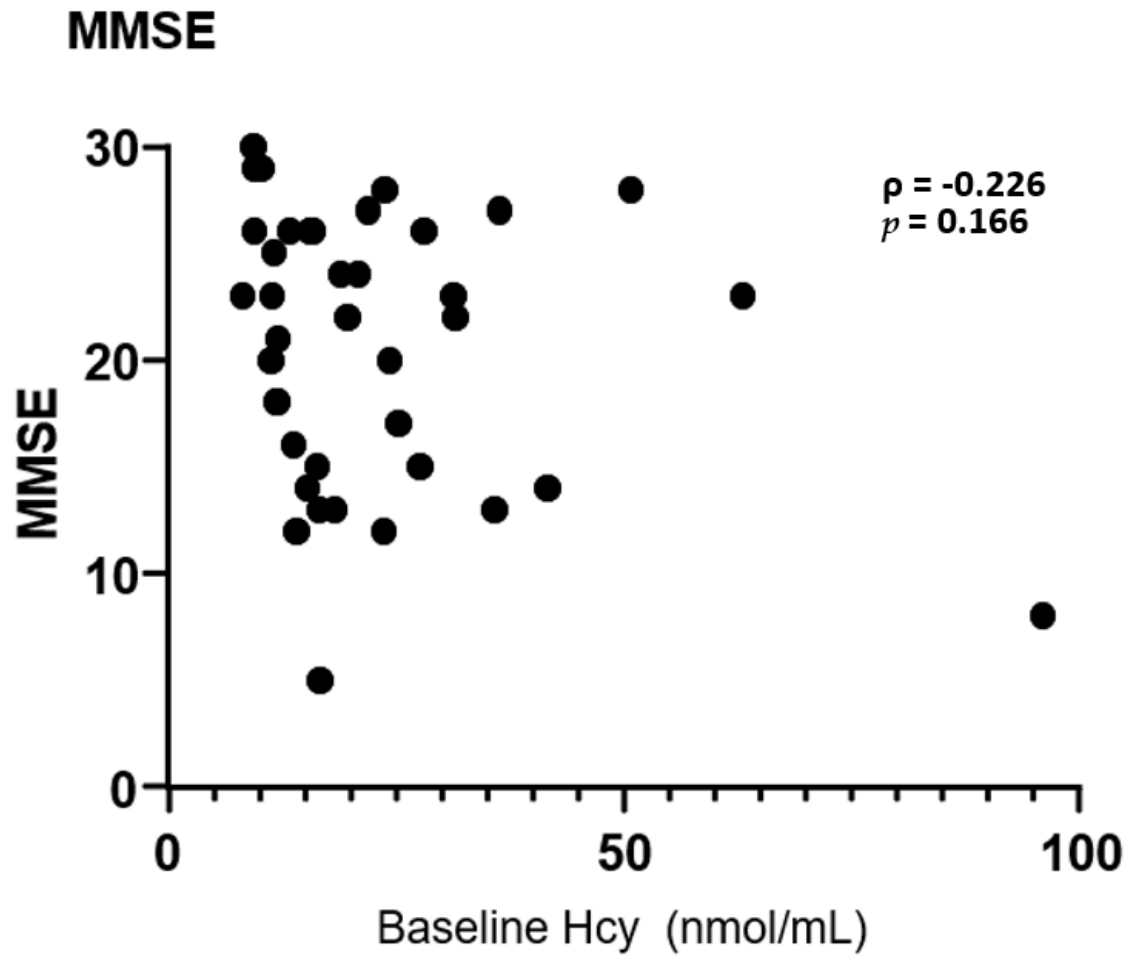

**Supplementary Figure S4.** No correlation is observed between baseline Mini-Mental State Examination (MMSE) score and baseline homocysteine (Hcy).  $\rho = -0.226$ ,  $p = 0.166$ . Spearman's rank correlation coefficient ( $\rho$ ) was used because the data of Hcy deviated from a normal distribution

## MMSE change

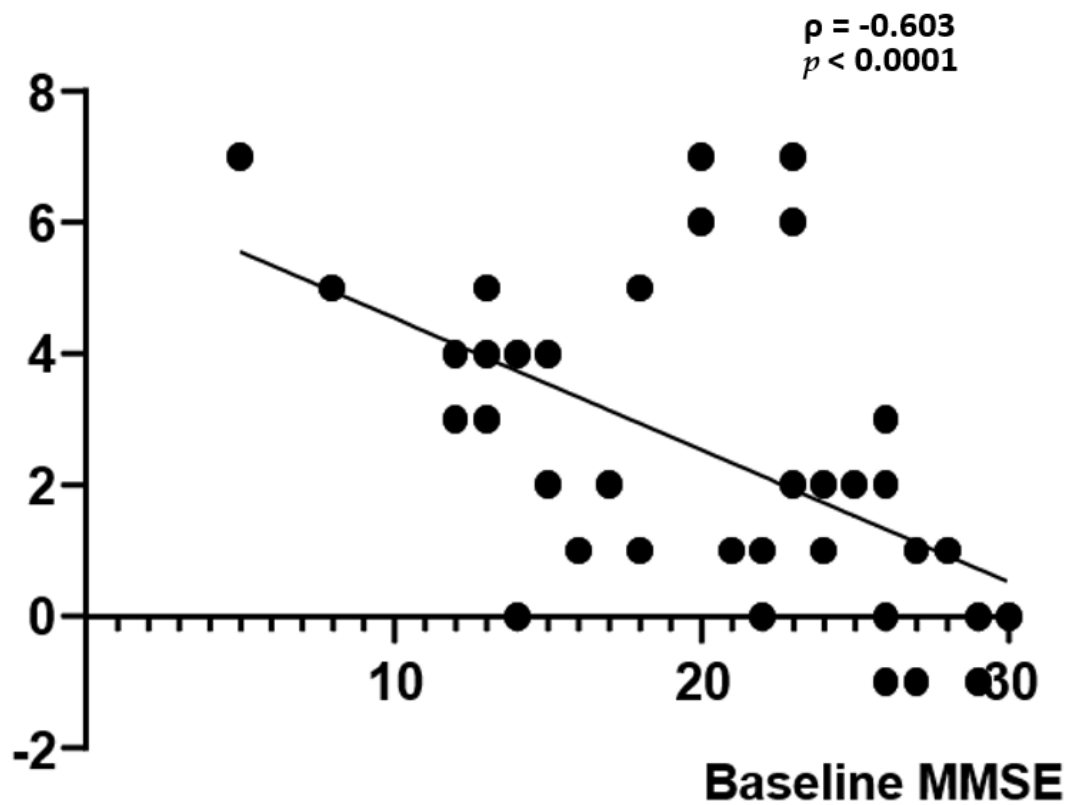

**Supplementary Figure S5.** Significant negative correlation is shown between baseline Mini-Mental State Examination (MMSE) score and degree of MMSE change following vitamin B<sub>12</sub> supplementation ( $\rho = -0.603$ ,  $p < 0.0001$ ). Spearman's rank correlation coefficient ( $\rho$ ) was used because the data of MMSE deviated from a normal distribution.

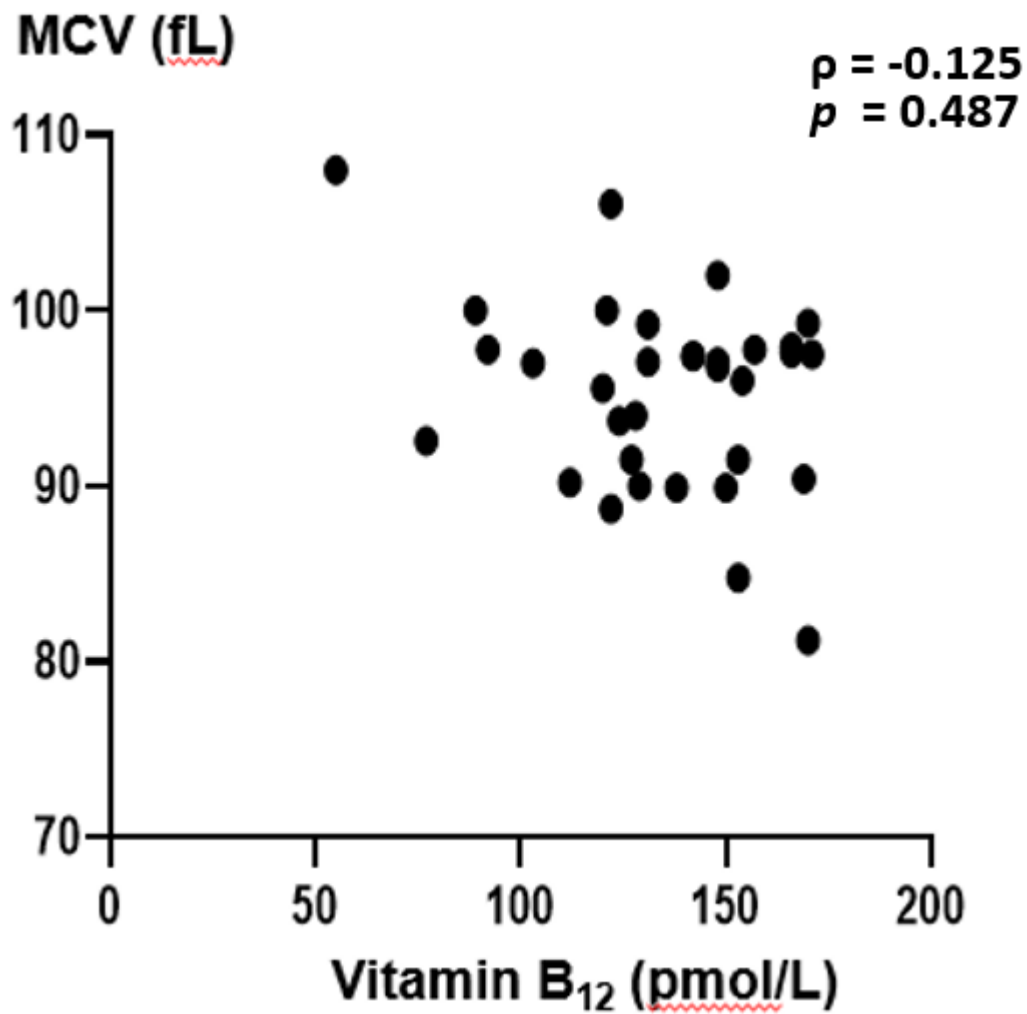

**Supplementary Figure S6.** There is no significant correlation between vitamin B<sub>12</sub> concentration and mean corpuscular volume (MCV) ( $\rho = -0.125$ ,  $p = 0.487$ ). Spearman's rank correlation coefficient ( $\rho$ ) was used because the data of vitamin B<sub>12</sub> deviated from a normal distribution

**Supplementary Table S1** Comparison of patient demographic data

|                                                | Included ( <i>n</i> = 39) | Not included ( <i>n</i> = 44) | <i>p</i> |
|------------------------------------------------|---------------------------|-------------------------------|----------|
| Age (Mean ± SD)                                | 80.1±8.2                  | 79.9±11.3                     | 0.739    |
| Male sex, n                                    | 22 (56%)                  | 27 (61%)                      | 0.649    |
| MMSE (Median(IQR) )                            | 22 (15-26)                | 21(16-24)                     | 0.531    |
| Vitamin B <sub>12</sub> (Median(IQR) ), pmol/L | 142 (122-154)             | 143 (124-157)                 | 0.715    |
| Folate (Median(IQR) ), pg/mL                   | 6.8 (5.0-8.4)             | 4.8 (3.1-8.2)                 | 0.004    |
| Hcy (Median(IQR) ), nmol/mL                    | 16.7 (12.0-27.7)          | 19.2 (15.1-28.9)              | 0.348    |
| MCV (Median(IQR) ), fL                         | 97.0 (91.0-97.9)          | 97.9 (93.7-100.0)             | 0.310    |
| VSRAD z-score (Median(IQR) )                   | 1.7 (1.2-2.6)             | 2.5 (1.5-4.2)                 | 0.029    |
| Education (Year) (Median (IQR) )               | 12 (8-12)                 | 9 (7.8-12)                    | 0.362    |

Comparison of demographic data between patients included in this study (*n* = 39) and those not included (*n* = 44). Abbreviations: Hcy, homocysteine; MMSE, Mini-Mental State Examination; (IQR); IQR, interquartile range; VSRAD, voxel-based specific regional analysis system developed for the study of Alzheimer's disease

**Supplementary Table S2** The detailed data of 39 patients

| No. | Age/<br>Sex | Education<br>(Years) | VitB <sub>12</sub> |       | Folate  | Hcy       |      | MCV   |         | MMSE |     |    | Interval<br>(Days) | Follow<br>up<br>Periods<br>(Months) | MRI  |       |
|-----|-------------|----------------------|--------------------|-------|---------|-----------|------|-------|---------|------|-----|----|--------------------|-------------------------------------|------|-------|
|     |             |                      | (pmol/L)           |       | (ng/mL) | (nmol/mL) |      | (fL)  | (years) |      |     |    |                    |                                     |      |       |
|     |             |                      | Pre                | Post  | Pre     | Pre       | Post | Pre   | Pre     | Post | 0.5 | 1  |                    |                                     | 2    | VSRAD |
| 1   | 75/M        | 12                   | 153                | >1107 | 53.0    | 23.8      | 15.0 | 91.5  | 28      | 29   | NA  | NA | NA                 | 112                                 | 10.7 | 1.60  |
| 2   | 66/M        | 16                   | 92                 | 753   | 17.5    | 50.8      | 7.2  | 97.8  | 28      | 29   | 29  | 29 | 29                 | 56                                  | >24  | NE    |
| 3   | 76/M        | 8                    | 55                 | 367   | 13.3    | 63.0      | 18.9 | 108.0 | 23      | 29   | 27  | 28 | NA                 | 28                                  | >24  | 2.91  |
| 4   | 79/F        | 12                   | 124                | 567   | 11.6    | 15.6      | 6.9  | 93.7  | 26      | 26   | 26  | 26 | 23                 | 56                                  | >24  | NE    |
| 5   | 88/M        | 12                   | 120                | NE    | 10.5    | 16.5      | 9.9  | 95.6  | 13      | 17   | 16  | 15 | 13                 | 56                                  | >24  | 2.06  |
| 6   | 85/M        | 12                   | 121                | 567   | 11.6    | 11.3      | 6.7  | 100.0 | 20      | 26   | 24  | 16 | 18                 | 30                                  | >24  | 1.71  |
| 7   | 84/F        | 12                   | 141                | NE    | 10.0    | 11.7      | NE   | NE    | 25      | 27   | NA  | NA | NA                 | 77                                  | >24  | 1.23  |
| 8   | 79/F        | NE                   | 89                 | 1012  | 9.7     | 96.0      | 3.7  | 100.0 | 8       | 13   | NA  | NA | NA                 | 84                                  | 8    | NE    |
| 9   | 75/M        | 9                    | 138                | 266   | 9.3     | 10.2      | 7.7  | 89.9  | 29      | 29   | 29  | 30 | 28                 | 69                                  | >24  | 1.96  |
| 10  | 87/M        | NE                   | 157                | >1107 | 8.4     | 13.8      | 7.4  | 97.8  | 16      | 17   | 18  | 18 | NA                 | 49                                  | 20   | 1.69  |
| 11  | 75/F        | 12                   | 146                | NE    | 8.4     | 18.9      | NE   | NE    | 24      | 26   | NA  | NA | NA                 | 35                                  | 1    | NE    |
| 12  | 87/M        | 8                    | 104                | 3054  | 8.3     | 41.7      | 10.4 | NE    | 14      | 18   | NA  | NA | NA                 | 84                                  | >24  | 3.59  |
| 13  | 68/M        | 6                    | 148                | NE    | 8.1     | 13.3      | NE   | 97.1  | 26      | 28   | NA  | NA | NA                 | 79                                  | 15   | NE    |
| 14  | 88/F        | NE                   | 170                | >1107 | 7.5     | 15.3      | 11.7 | 81.2  | 14      | 14   | 14  | 12 | NA                 | 56                                  | >24  | 3.09  |
| 15  | 71/M        | 12                   | 142                | NE    | 7.4     | 9.5       | NE   | 97.4  | 29      | 28   | 28  | 28 | 27                 | 56                                  | >24  | NE    |
| 16  | 84/F        | 9                    | 112                | 323   | 6.8     | 35.8      | 16.2 | 90.2  | 13      | 16   | 14  | 11 | NA                 | 28                                  | >24  | 2.51  |
| 17  | 81/F        | 8                    | 167                | NE    | 6.7     | 8.2       | NE   | NE    | 23      | 25   | NA  | NA | NA                 | 84                                  | >24  | NE    |
| 18  | 77/M        | 8                    | 166                | NE    | 6.6     | 11.8      | NE   | 97.6  | 18      | 19   | NA  | NA | NA                 | 35                                  | 2    | NE    |
| 19  | 87/M        | 8                    | 166                | 434   | 6.4     | 24.3      | 13.8 | 97.9  | 20      | 27   | NA  | NA | NA                 | 56                                  | 5    | 1.04  |
| 20  | 90/F        | NE                   | 142                | NE    | 6.4     | 16.3      | NE   | NE    | 15      | 17   | NA  | NA | NA                 | 84                                  | 4    | NE    |
| 21  | 79/M        | 16                   | 167                | NE    | 6.4     | 11.4      | 9.5  | NE    | 23      | 25   | 23  | 21 | 20                 | 35                                  | >24  | 2.09  |
| 22  | 89/F        | 12                   | 131                | 496   | 6.1     | 21.9      | 13.4 | 97.1  | 27      | 26   | 25  | 24 | 23                 | 133                                 | >24  | 1.27  |
| 23  | 84/M        | 8                    | 148                | >1107 | 5.3     | 12.0      | 8.4  | 102.0 | 21      | 22   | 21  | 18 | 17                 | 70                                  | >24  | NE    |
| 24  | 75/F        | 12                   | 150                | 379   | 5.3     | 9.4       | 6.0  | 89.9  | 30      | 30   | 30  | 30 | 30                 | 56                                  | >24  | 1.19  |
| 25  | 91/F        | 8                    | 128                | 300   | 5.0     | 14.1      | 15.0 | 94.0  | 12      | 16   | 14  | 14 | 15                 | 49                                  | >24  | NE    |
| 26  | 80/M        | 9                    | 154                | 510   | 4.9     | 20.8      | 15.1 | 96.0  | 24      | 25   | NA  | NA | NA                 | 52                                  | >24  | 1.10  |
| 27  | 78/M        | NE                   | 153                | 283   | 4.9     | 27.7      | NE   | 84.8  | 15      | 19   | NA  | NA | NA                 | 28                                  | 9    | NE    |
| 28  | 87/F        | NE                   | 103                | 639   | 4.8     | 31.5      | NE   | 97.0  | 22      | 22   | NA  | NA | NA                 | 84                                  | 8    | NE    |
| 29  | 90/F        | 8                    | 148                | 602   | 4.7     | 23.7      | 14.2 | 96.8  | 12      | 15   | NA  | 15 | NA                 | 21                                  | 18   | 2.31  |
| 30  | 78/M        | 8                    | 122                | 760   | 4.4     | 12.0      | 10.4 | 106.1 | 18      | 23   | 22  | 20 | 19                 | 86                                  | >24  | NE    |
| 31  | 84/M        | NE                   | 131                | 930   | 4.2     | 19.7      | 12.1 | 99.2  | 22      | 23   | 21  | 17 | 13                 | 56                                  | >24  | 1.03  |
| 32  | 49/M        | 12                   | 77                 | 753   | 3.8     | 28.1      | 11.8 | 92.6  | 26      | 28   | NA  | NA | NA                 | 120                                 | >24  | 1.23  |
| 33  | 75/F        | 12                   | 169                | >1107 | 6.3     | 36.3      | 13.1 | 90.4  | 27      | 28   | 27  | 27 | 27                 | 77                                  | >24  | 0.77  |
| 34  | 77/F        | 12                   | 170                | 364   | 7.3     | 15.9      | 11.6 | 99.3  | 26      | 29   | 30  | NA | NA                 | 43                                  | 11   | 3.18  |



|    |      |    |     |     |     |      |      |      |    |    |    |    |    |    |     |      |
|----|------|----|-----|-----|-----|------|------|------|----|----|----|----|----|----|-----|------|
| 35 | 81/F | 12 | 129 | 640 | 7.6 | 16.7 | 15.0 | 90.0 | 5  | 12 | NA | NA | NA | 77 | 10  | 1.55 |
| 36 | 89/M | NE | 122 | 278 | 4.9 | 25.3 | 17.3 | 88.7 | 17 | 19 | NA | NA | NA | 28 | 4   | 2.62 |
| 37 | 85/F | NE | 171 | 586 | 6.9 | 18.3 | 10.0 | 97.5 | 13 | 18 | NA | NA | NA | NA | >24 | 3.92 |
| 38 | 79/M | 9  | 127 | 511 | 4.4 | 31.3 | 17.4 | 91.5 | 23 | 30 | 29 | 28 | 27 | 67 | >24 | NE   |
| 39 | 71/M | 12 | 142 | 720 | 7.4 | 9.5  | 7.8  | 97.4 | 26 | 25 | 25 | 25 | 25 | 56 | >24 | NE   |

---

Data of all 39 patients; age, sex, laboratory tests for vitamin B12, folate, Hcy, and MMSE score. MCV was performed for 33 and MRI VSRAD was performed for 23 patients. Abbreviations: Hcy, homocysteine, MCV, mean corpuscular volume; MMSE, Mini-Mental State Examination; MRI, magnetic resonance imaging; VSRAD, voxel based specific regional analysis system developed for the study of Alzheimer's disease; NE, not examined; NA, not available; M, male; F, female.
